# Supplementary material for: Mouse models of human CNTNAP1-associated congenital hypomyelinating neuropathy and genetic restoration of murine neurological deficits
Source: PubMed Central journal article supplement — Cell Rep. Author manuscript; Available in PMC 2024 Feb 16. (PMC10873044; doi:10.1016/j.celrep.2023.113274), 2023-10-19
Supplement: NIHMS1941930-supplement-1.pdf [file NIHMS1941930-supplement-1.pdf]

Cell Reports, Volume 42

## **Supplemental information**

### **Mouse models of human *CNTNAP1*-associated congenital hypomyelinating neuropathy and genetic restoration of murine neurological deficits**

**Cheng Chang, Lacey B. Sell, Qian Shi, and Manzoor A. Bhat**

## Supplementary Figure 1

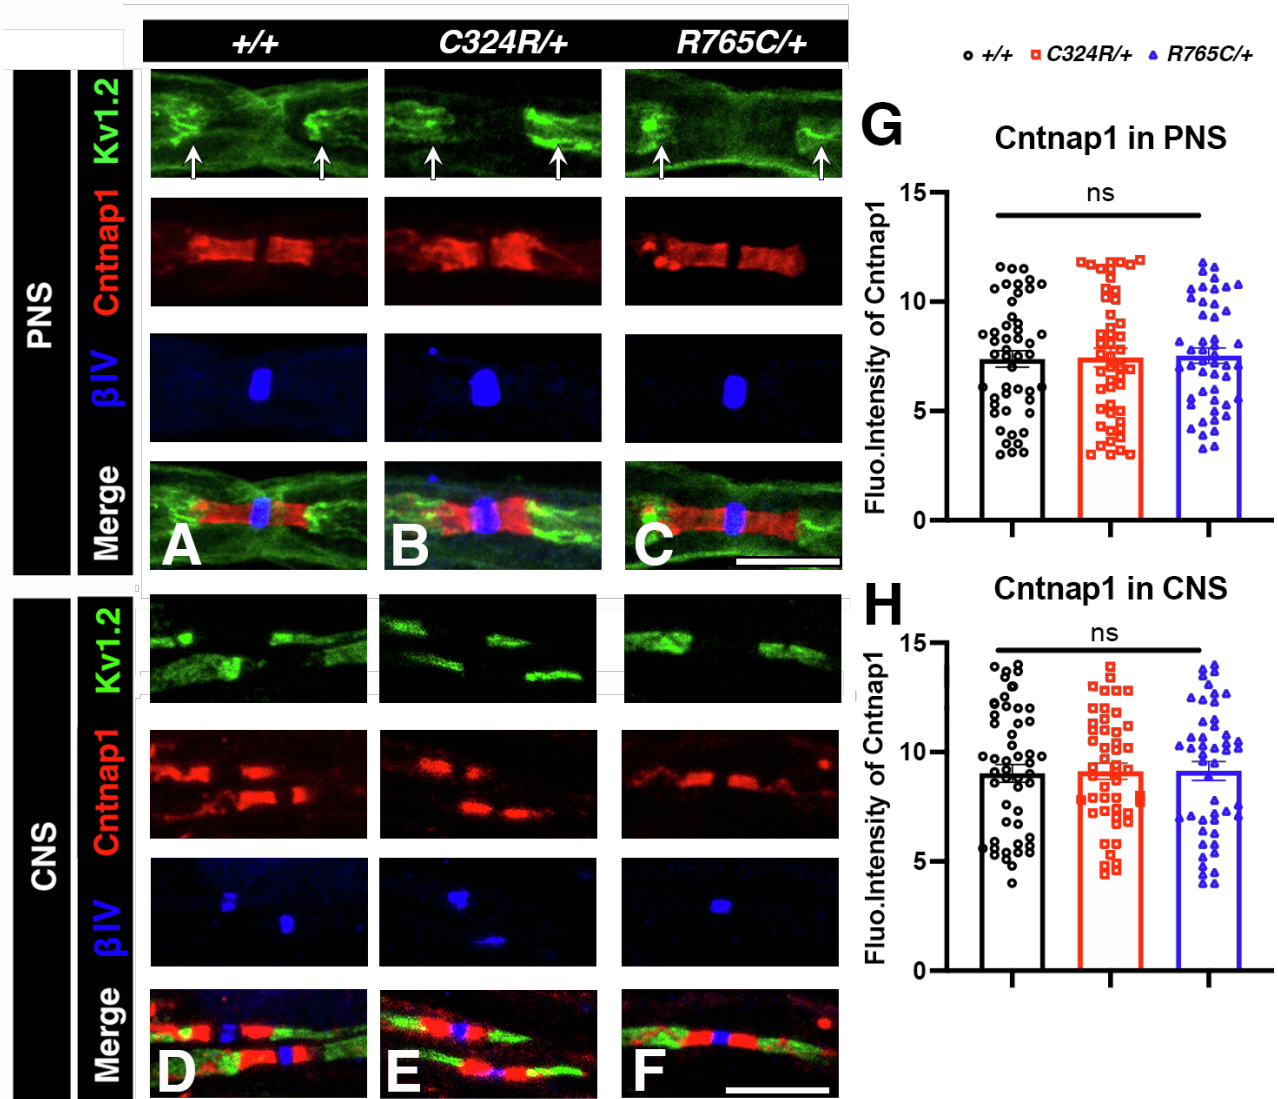

**Supplementary Figure 1.** Cntnap1 heterozygous mice (*Cntnap1*<sup>C324R/+</sup> and *Cntnap1*<sup>R765C/+</sup>) do not exhibit differences in intensity and distribution of Cntnap1 in paranodal regions.

(A-C) Immunostaining of sciatic nerves from *+/+* (A), *C324R/+* (B) and *R765C/+* (C) mice using antibodies against Kv1.2 (juxtaparanodes, green), Cntnap1 (paranodes, red) and  $\beta$ IV Spectrin (nodes, blue). Scale Bar: 5  $\mu$ m.

(D-F) Immunostaining of spinal cord from *+/+* (D), *C324R/+* (E) and *R765C/+* (F) mice using antibodies against Kv1.2 (juxtaparanodes, green), Cntnap1 (paranodes, red) and  $\beta$ IV Spectrin (nodes, blue). Scale Bar: 5  $\mu$ m.

(G) The measurement of relative fluorescence intensity of Cntnap1 at the paranodes in the sciatic nerves in *+/+*, *C324R/+*, *R765C/+* mice.

(H) The measurement of relative fluorescence intensity of Cntnap1 at the paranodes in the spinal cords in *+/+*, *C324R/+* and *R765C/+* mice.

Supplementary Figure 2

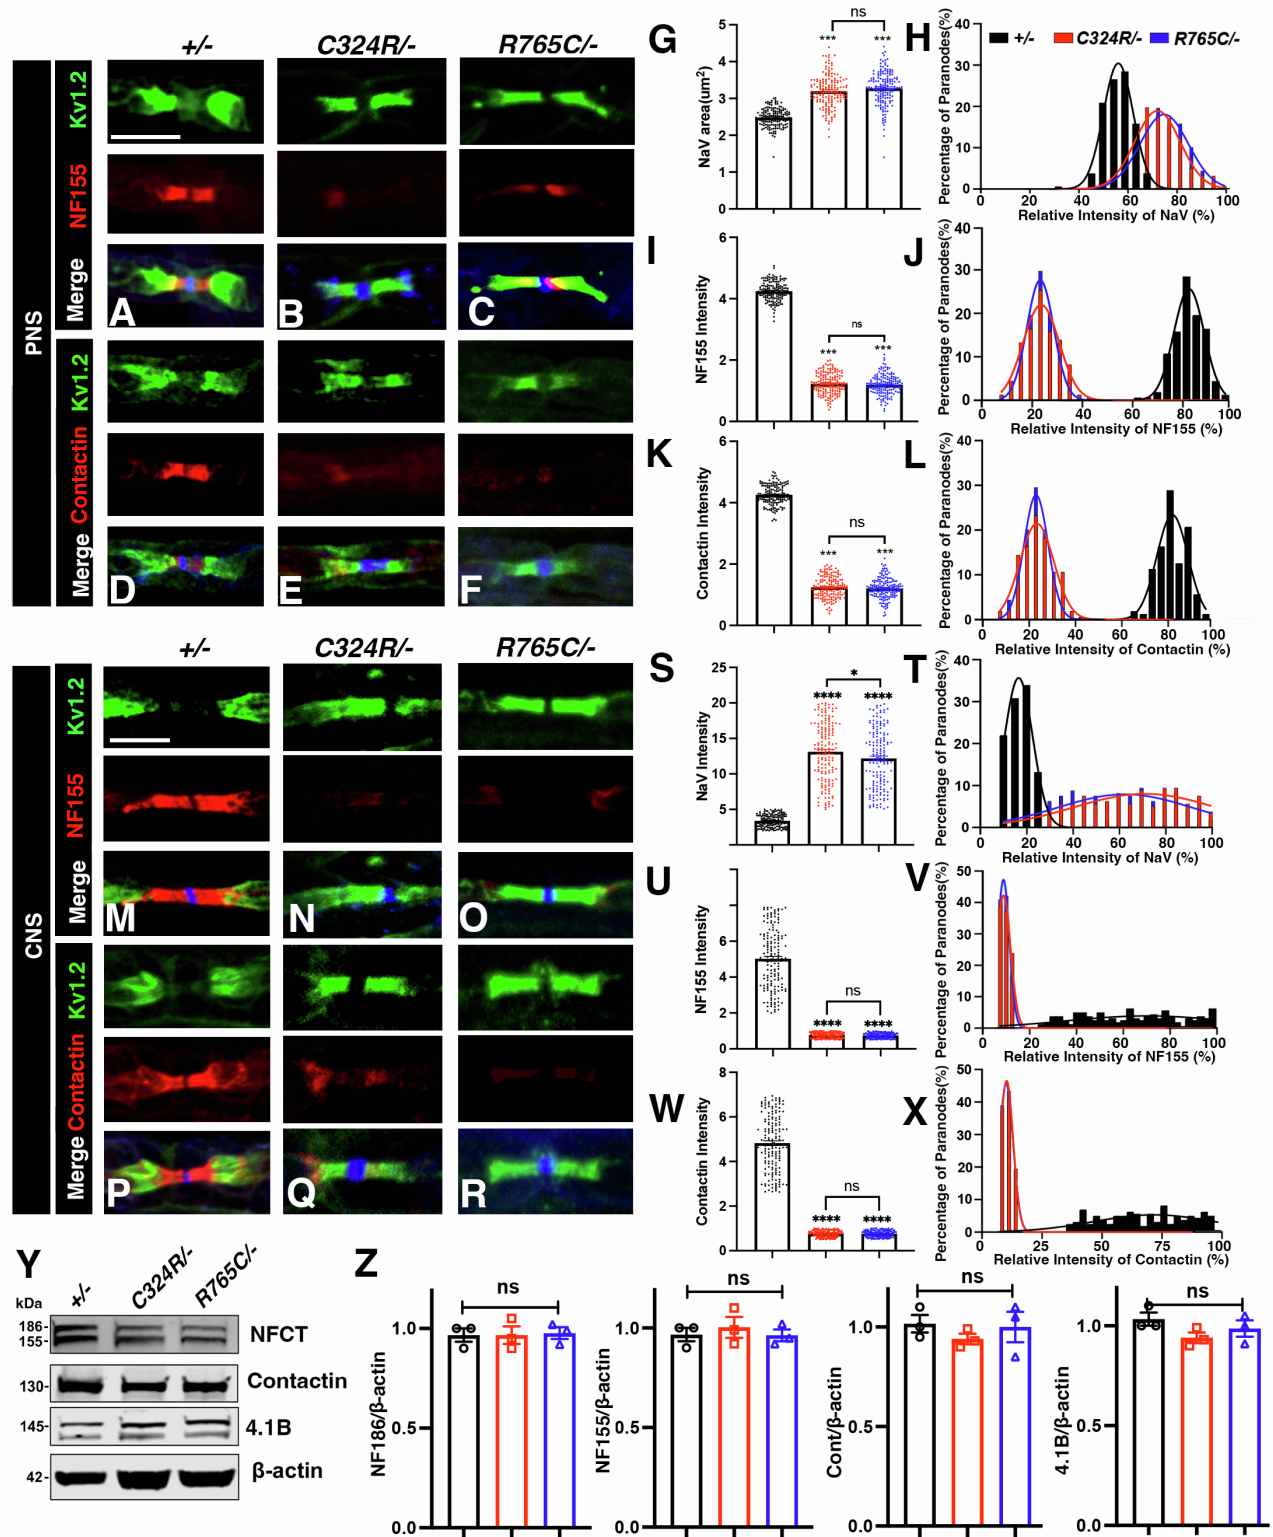

**Supplementary Figure 2. Key Paranodal Proteins Fail to Localize Properly in Cntnap1C324R/- and Cntnap1R765C/- Mouse Mutants**

(A-F) Immunostaining of sciatic nerves. Scale Bar: 5  $\mu$ m.

(G-L) Quantification of the relative fluorescence intensity and distribution of nodal NaV, paranodal NF155 and Contactin from +/-, C324R/- and R765C/- mice.

(M-R) Immunostaining of spinal cords from +/-, C324R/- and R765C/- mice. Scale Bar: 5  $\mu$ m.

(S-X) Quantification of the relative fluorescence intensity and distribution of nodal NaV, paranodal NF155 and Contactin from +/-, C324R/- and R765C/- mice.

(Y) Representative immunoblots showing protein expression of total Neurofascin (NF186 and NF155) (using NF-CT antibody), Contactin, 4.1B in spinal cords.

(Z) Quantification of relative band intensities of the proteins immunoblotted in Y.

Data are represented as the mean  $\pm$  SEM of 3-6 biological replicates.

Supplementary Figure 3

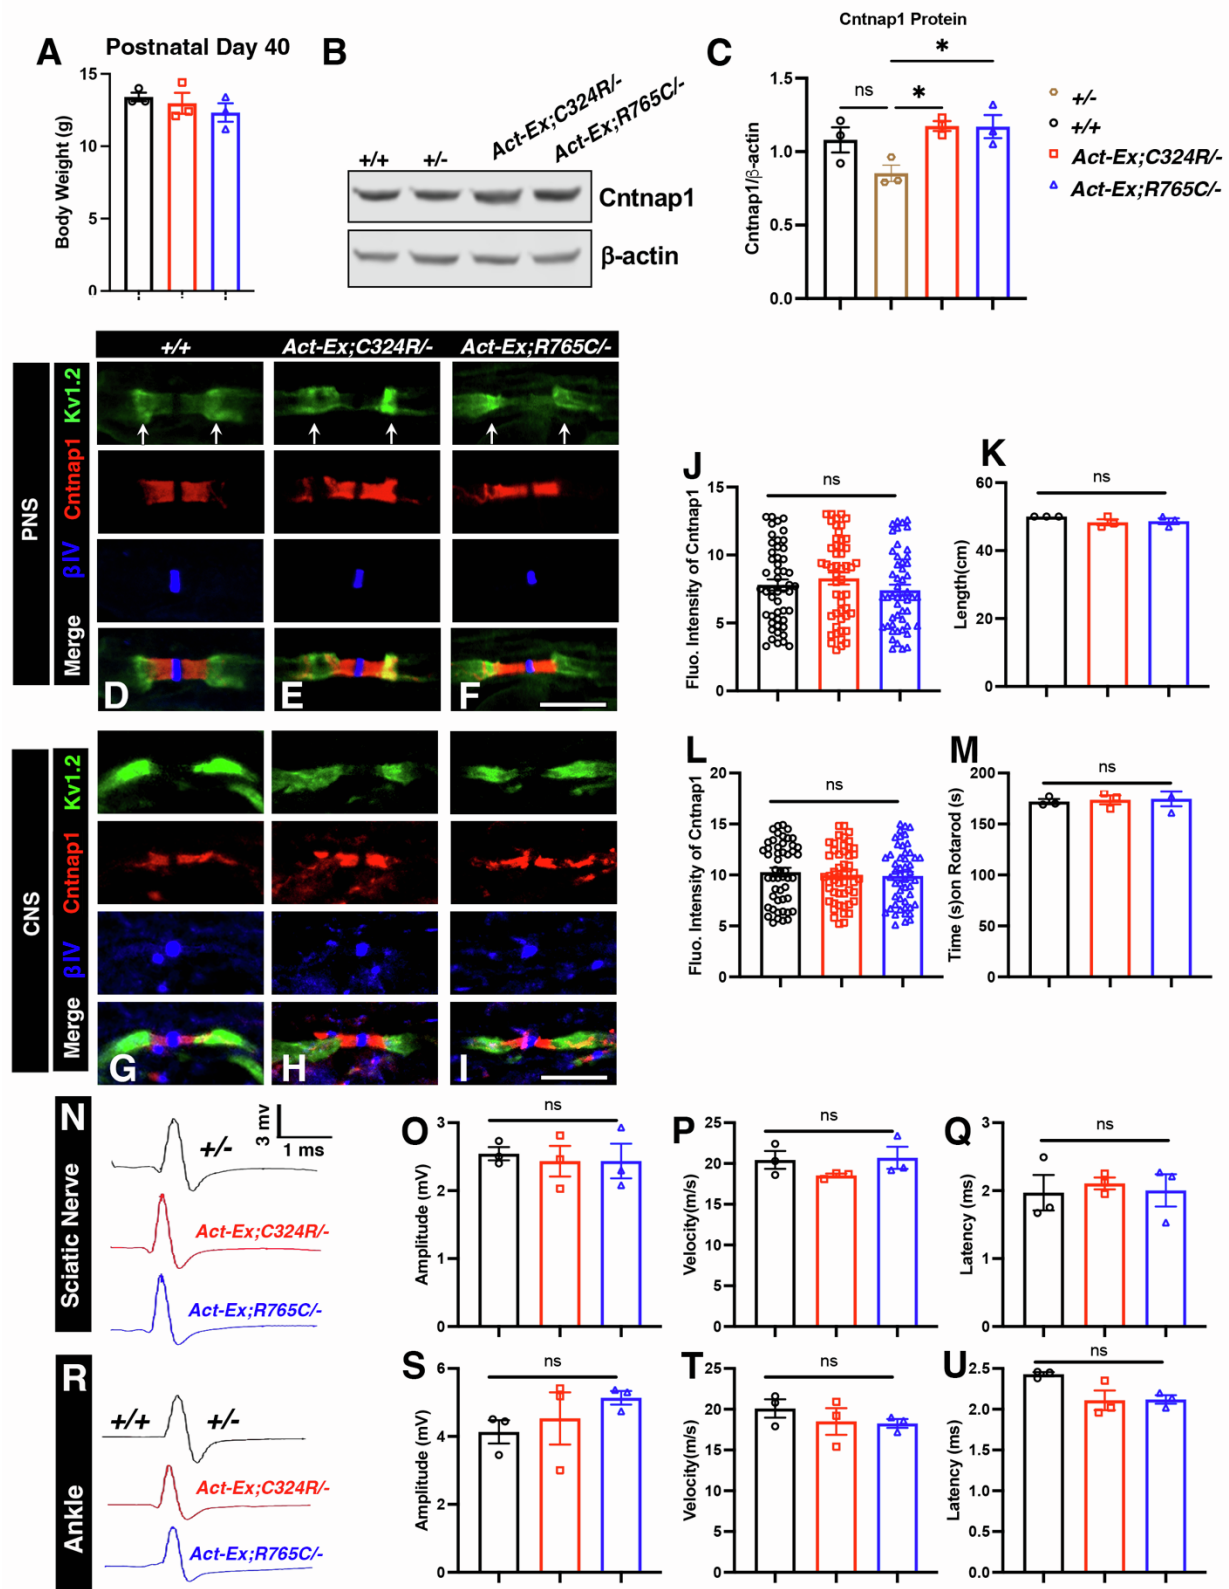

**Supplementary Figure 3.** Global Expression of the Wild-type Cntnap1 Gene Completely Restores the Axonal Domain Organization, motor function and nerve conduction velocity in Cntnap1C324R/- and Cntnap1R765C/- Mutants.

**(A)** Body weights of wild-type (+/+), *Act-Ex;C324R/-* and *Act-Ex;R765C/-* mice at postnatal day 40.

**(B-C)** Representative immunoblots showing the protein expression of Cntnap1 in the CNS (spinal cords) from wild-type (+/+), *Act-Ex;C324R/-* and *Act-Ex;R765C/-* mice; and the relative band intensity was quantified in **C**.

**(D-F)** Immunostaining of sciatic nerves from wild-type (+/+), *Act-Ex;C324R/-* and *Act-Ex;R765C/-* mice using antibodies against K<sub>v</sub>1.2 (juxtaparanodes, green), Cntnap1 (paranodes, red) and  $\beta$ IV Spectrin (nodes, blue). Scale Bar: 5  $\mu$ m.

**(G-I)** Immunostaining of spinal cord from wild-type (+/+), *Act-Ex;C324R/-* and *Act-Ex;R765C/-* mice using antibodies against K<sub>v</sub>1.2 (juxtaparanodes, green), Cntnap1 (paranodes, red) and  $\beta$ IV Spectrin (nodes, blue). Scale Bar: 5  $\mu$ m.

**(J)** The measurement of relative fluorescence intensity of Cntnap1 at the paranodes in the sciatic nerves in wild-type (+/+), *Act-Ex;C324R/-* and *Act-Ex;R765C/-* mice.

**(K)** Beam walking motor coordination performance of wild-type (+/+), *Act-Ex;C324R/-* and *Act-Ex;R765C/-* mice. Walking distances traveled by each mouse (the full length of the beam is 50 cm).

**(L)** The measurement of relative fluorescence intensity of Cntnap1 at the paranodes in the spinal cords in wild-type (+/+), *Act-Ex;C324R/-* and *Act-Ex;R765C/-* mice.

**(M)** Motor learning ability of +/+, *Act-Ex;C324R/-* and *Act-Ex;R765C/-* mice as measured by Rotarod test. The total time spent on the rotarod for each trial is quantified here.

**(N-U)** Representative electrical impulse traces from the ankle (**N**) and sciatic nerves (**R**) from +/+, *Act-Ex;C324R/-* and *Act-Ex;R765C/-* (all at P40). Measurement and quantification of amplitude (**O**, **S**), nerve conduction velocity (NCV) (**P**, **T**) and latency (**Q**, **U**).

## Supplementary Figure 4

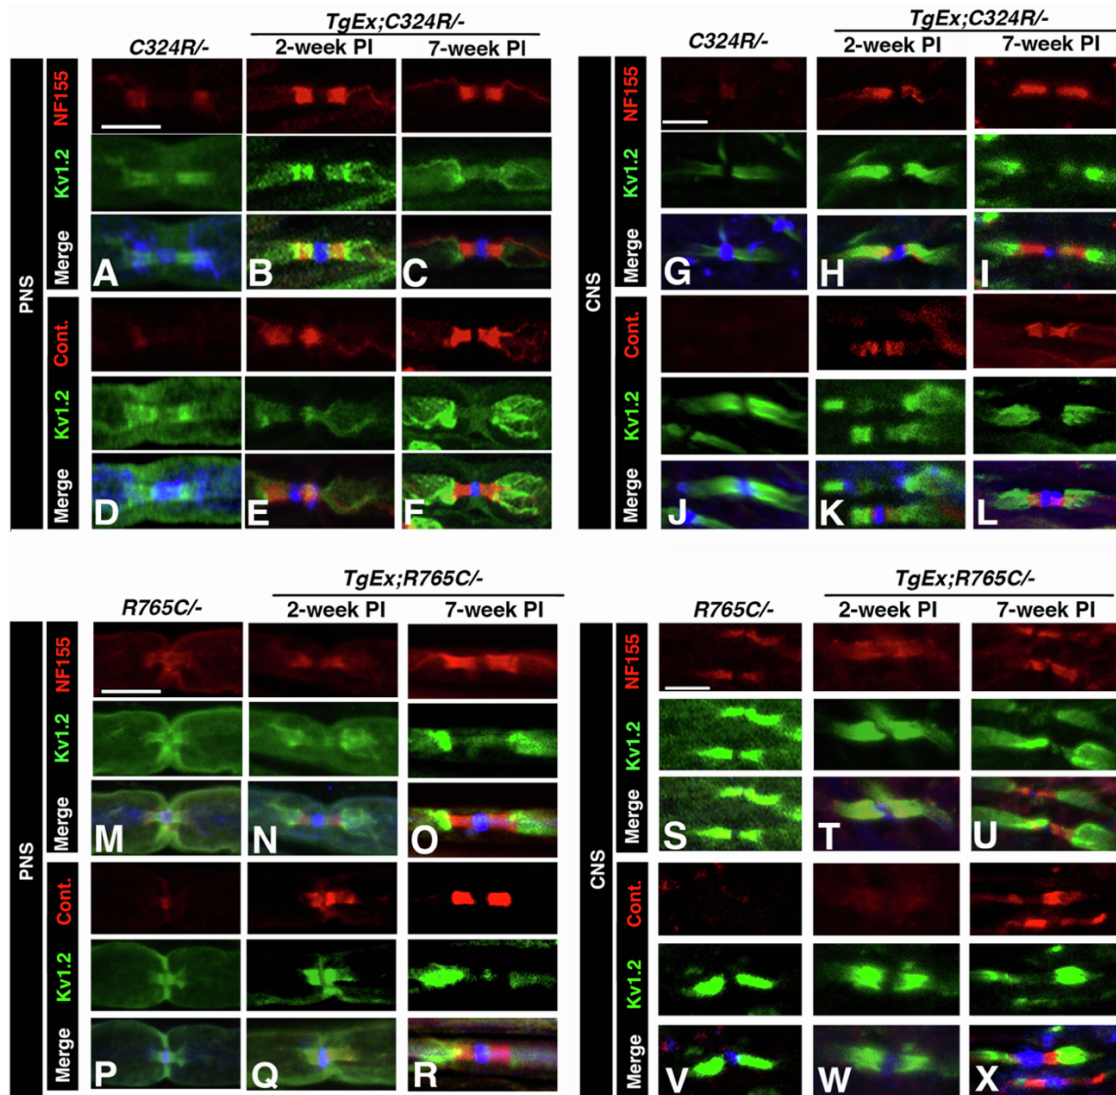

**Supplementary Figure 4.** Neuronal Expression of the Wild-type *Cntnap1* Gene Progressively Restores the Axonal Domain Organization and Expression of Contactin and Neurofascin155 in *Cntnap1*<sup>C324R/-</sup> and *Cntnap1*<sup>R765C/-</sup> Mutant Myelinated Axons. (A-L) Immunostaining of sciatic nerves (A-F) or spinal cords (G-L) from *Cntnap1*<sup>C324R/-</sup> (A, D, G, J), and *LSL-Cntnap1*;*Slick-H-Cre*;*Cntnap1*<sup>C324R/-</sup> (*TgEx*;*C324R/-*) mice at 2 weeks (B, E, H, K) or 7 weeks (C, F, I, L) after tamoxifen injection using antibodies against Kv1.2 (juxtaparanodes, green), Neurofascin<sup>155</sup> or Contactin (paranodes, red) and Nav channels (nodes, blue). Scale Bar: 5  $\mu$ m. (M-X) Immunostaining of sciatic nerves (M-R) or spinal cords (S-X) from *Cntnap1*<sup>R765C/-</sup> (M, P, S, V), and *LSL-Cntnap1*;*Slick-H-Cre*;*Cntnap1*<sup>R765C/-</sup> (*TgEx*;*R765C/-*) mice at 2 weeks (N, Q, T, W) or 7 weeks (O, R, U, X) after tamoxifen injection using antibodies against Kv1.2 (juxtaparanodes, green), *Cntnap1* or Flag (paranodes, red) and Nav channels (nodes, blue). Scale Bar: 5  $\mu$ m.

## Supplementary Figure 5

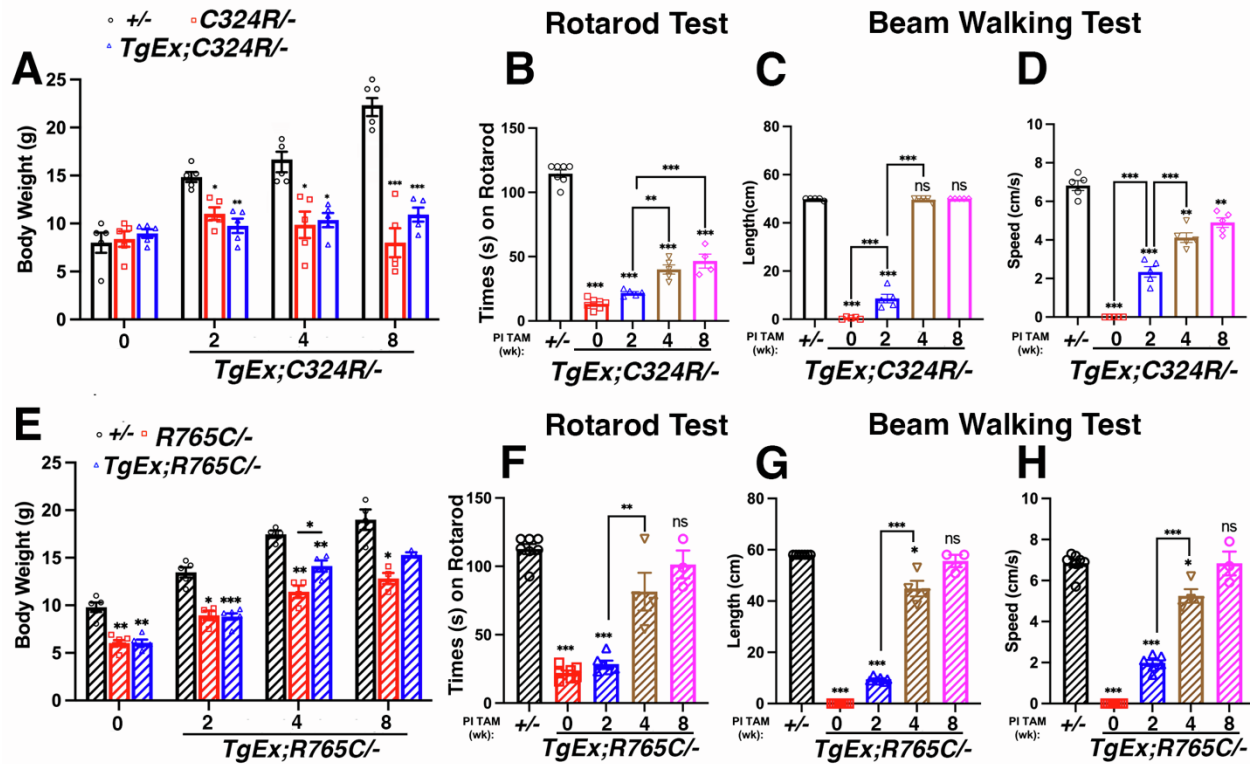

**Supplementary Figure 5.** Neuronal overexpression of wild-type *Cntnap1* restoration of body weight and motor functions.

(A) The body weight of age-matched +/- (control), *C324R*/-, and *TgEx*;*C324R*/- at various stages after tamoxifen injection.

(B) Rotarod test showing motor performance by +/- (control), *C324R*/-, and *TgEx*;*C324R*/- at various stages after tamoxifen injection.

(C, D) Motor coordination performance in beam walking tests measured as walking distances (C) and walking speed (D) by +/- (control), *C324R*/-, and *TgEx*;*C324R*/- at various stages after tamoxifen injection.

(E) The body weight of age-matched +/-, *R765C*/-, and *TgEx*;*R765C*/- at various stages after tamoxifen injection.

(F) Rotarod test showing motor performance by +/-, *R765C*/-, and *TgEx*;*R765C*/- mutants at various stages after tamoxifen injection.

(G, H) Motor coordination performance in beam walking tests measured as walking distances (G) and walking speed (H) by +/-, *R765C*/-, and *TgEx*;*R765C*/- mutants at various stages after tamoxifen injection.

## Supplementary Figure 6

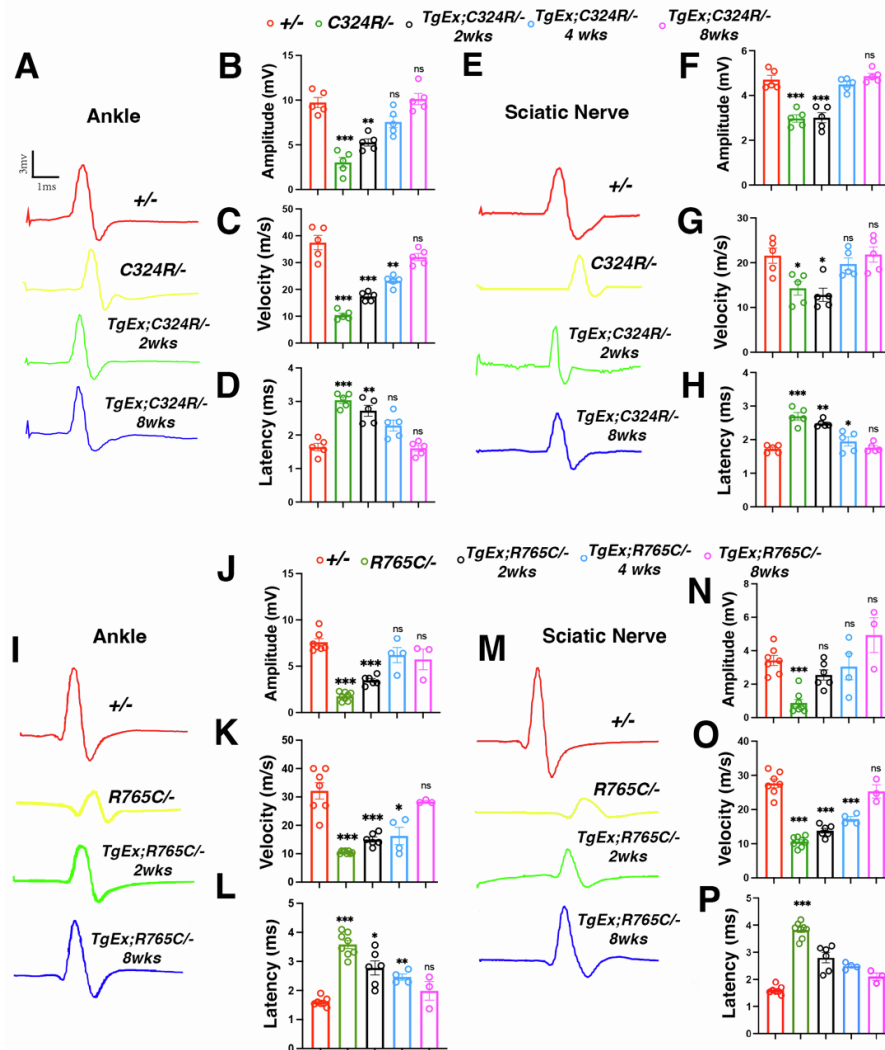

**Supplementary Figure 6.** P21 Neuronal Expression of the Wild-type *Cntnap1* Gene Progressively Restores Nerve Conduction Properties in *Cntnap1*<sup>C324R/-</sup> and *Cntnap1*<sup>R765C/-</sup> Mutant Mice.

(A-H) Representative electrical impulse traces from the ankle (A) and sciatic nerves (E) from *Cntnap1*<sup>+/-</sup> (control, P40), *Cntnap1*<sup>C324R/-</sup> (P40), TgEx; C324R/- mice 2 weeks or 8 weeks after tamoxifen injection. Measurement and quantification of amplitude (B, F), nerve conduction velocity (NCV) (C, G) and latency (D, H).

(I-P) Representative electrical impulse traces from the ankle (I) and sciatic nerves (M) from *Cntnap1*<sup>+/-</sup> (control, P40), *Cntnap1*<sup>R765C/-</sup> (P40), TgEx;R765C/- mice 2 weeks or 8 weeks after tamoxifen injection. Measurement and quantification of amplitude (J, N), nerve conduction velocity (NCV) (K, O) and latency (L, P).

Comparisons between genotypes were performed by one-way ANOVA with Tukey post test (all quantification data panel). \*\*  $p < 0.01$ , \*\*\*  $p < 0.001$  as compared with control. All data are presented as Mean  $\pm$  S.E.M.

## Supplementary Figure 7

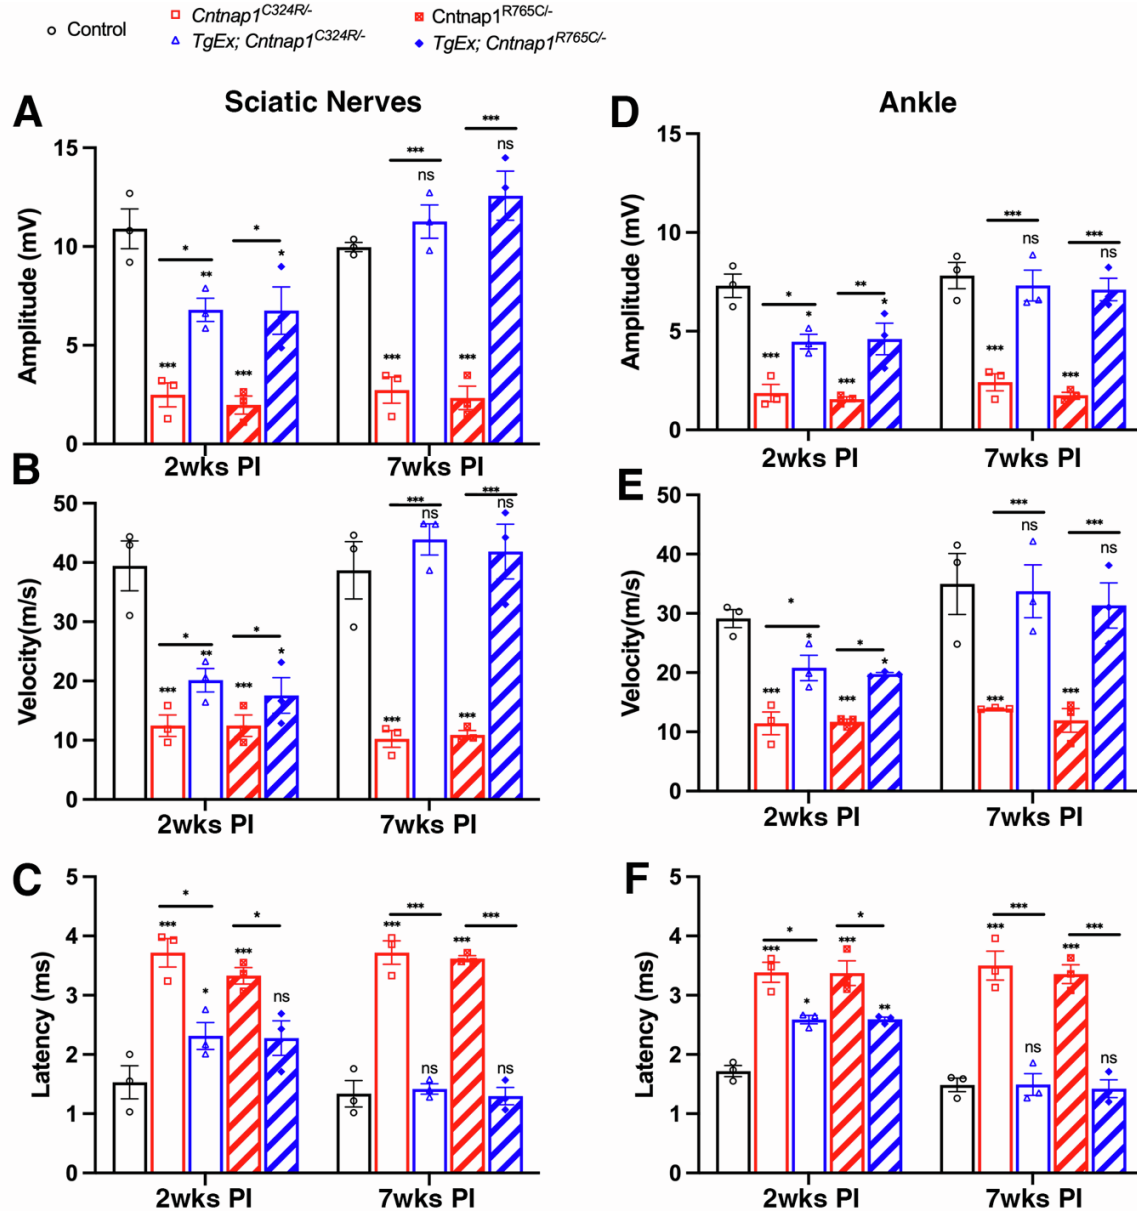

**Supplementary Figure 7.** Earlier Neuronal Expression (P5) of the Wild-type *Cntnap1* Gene Completely Restores Nerve Conduction Properties in *Cntnap1*<sup>C324R/-</sup> and *Cntnap1*<sup>R765C/-</sup> Mutant Mice.

Measurement and quantification of nerve conduction from the sciatic nerves (A-C) and ankle (D-F) from *Cntnap1*<sup>+/-</sup> (control, age matched), *Cntnap1*<sup>R765C/-</sup>, *TgEx;R765C/-* mice 2 weeks or 7 weeks after tamoxifen injection at P5-P7. Measurement and quantification of amplitude (A, D), nerve conduction velocity (NCV) (B, E) and latency (C, F).

Comparisons between genotypes within the same injection group were performed by one-way ANOVA with Tukey post test (all quantification data panel). n.s., non-significant; \*  $p < 0.01$ , \*\*  $p < 0.01$ , \*\*\*  $p < 0.001$  as compared with control. All data are presented as Mean  $\pm$  S.E.M.

## Supplementary Figure 8

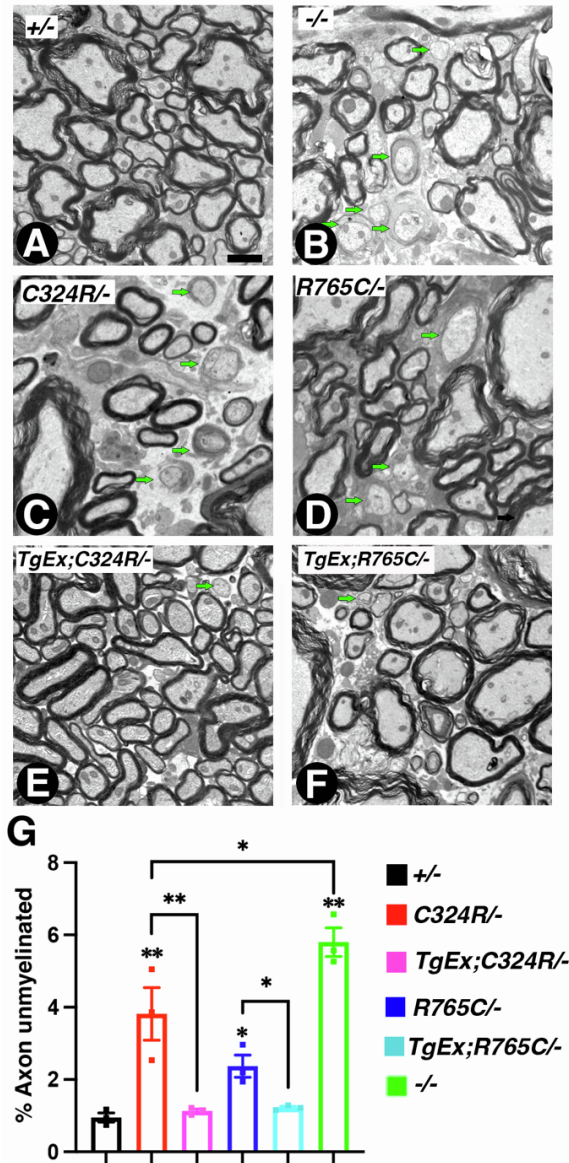

### Supplementary Figure 8. Neuronal Expression of Cntnap1 Rescues Reduced Myelination in $C324R/-$ and $R765C/-$ Mutants

(A–F) 7 weeks after tamoxifen injection, TEM of cross sections from the spinal cords of 2 months old  $+/-$  (control) (A),  $-/-$  (B),  $C324R/-$  (C),  $R765C/-$  (D),  $TgEx;C324R/-$  (E), and  $TgEx;R765C/-$  (F) mice. Unmyelinated axons were indicated with green arrows. Scale bar = 2  $\mu$ m.

(G) Morphometric analysis showing percentage of unmyelinated axons of total axons in spinal cord from all genotypes mentioned above. Comparisons between genotypes within the groups were performed by one-way ANOVA with Tukey post test (all quantification data panel). \*  $p < 0.01$ , \*\*  $p < 0.01$ , \*\*\*  $p < 0.001$  as compared with  $+/-$  control. All data are presented as Mean  $\pm$  S.E.M.

**Supplementary Table 1**  
**List of DNA sequences for generating the transgenic mutant mice**

| Mice line                          | gRNA                         | Donor DNA                                                                                                                                                                                                                   |
|------------------------------------|------------------------------|-----------------------------------------------------------------------------------------------------------------------------------------------------------------------------------------------------------------------------|
| <i>Cntnap1</i> <sup>C324R/-</sup>  | GCCUACC<br>GCCAUAA<br>UUUUCG | CCTAAGCCCATGGAAATGTCTCTTCATCTGCTTCC<br>TACAGATATTCATCGGGGGTCTAGTGGGCGCAGC<br>CCGTAAGAACCTGGCCTACCGCCATAATTTTCGC<br>GGCCGCATAGAAAACGTGATCTACAACCGGATCA<br>ACATTGCAGAAATGGCAGTGATGCGCCATTTCGCG<br>GATCACCTTTGAGGCCAGTGGGCAGGG |
| <i>Cntnap1</i> <sup>R765C/-</sup>  | CUCAAU<br>UCUGAAG<br>CUCAGU  | GAGTCACCGAATCCTATATTCCCACAGGAGAACA<br>GACAAGGGGCTCCTGACCTTTGTAGACCATCTGC<br>CTGTCACTCAGGTAGTGGTAGGTGATACAAACtGC<br>TCAAATTCTGAAGCTCAGTTCTTCCTGAGGCCTCT<br>GCGCTGCTATGGTGACCGTGAGTGGCAGACTCCT<br>TTGGTGTGCCTGTCCAGTACTGTTTC  |
| <i>LSL-Cntnap1</i> <sup>Flag</sup> | ACUCCAG<br>UCUUUCU<br>AGAAGA | Linearized <i>LSL-GAG-Cntnap1</i> <sup>Flag</sup> construct                                                                                                                                                                 |

**Supplementary Table 2**  
**List of DNA primers for generating Cntnap1 mutant plasmid**

| <b>DNA mutant</b>        | <b>Forward primers</b>                                     | <b>Reverse Primers</b>                             |
|--------------------------|------------------------------------------------------------|----------------------------------------------------|
| Cntnap1 <sup>C324R</sup> | GCCATAACTTCCGTGG <u>CCG</u><br><u>C</u> ATAGAAAACGTGATCTAC | GTAGATCACGTTTTCTAT <u>GCGGC</u><br>CACGGAAGTTATGGC |
| Cntnap1 <sup>R765C</sup> | GGTAGGTGATACAACT <u>G</u> C<br>TCAAATTCTGAAGC              | GCTTCAGAATTTGAG <u>CAG</u> TTTGT<br>ATCACCTACC     |

\* The underline indicates the codon for substituting amino acids.
